# Supplementary material
Source: publisher figshare collection journal article supplement (https://tandf.figshare.com/ndownloader/files/18527027)
Supplement: Supplementary file 1 [file 18527027]

# References in the Literature Review

3D defect detection fills the 450mm industry gap, 2013. . EuroAsia Semicond. 35, 26–27.

Al-Ahmari, A.M.A., 2008. Prediction and optimisation models for turning operations. Int. J. Prod. Res. 46, 4061–4081. https://doi.org/10.1080/00207540601113265

Alam, M.A., Ali, M.M.N., Syed, M.A.A.A., Sorif, N., Rahaman, M.A., 2014. An algorithm to detect and identify defects of industrial pipes using image processing. Ski. 2014 - 8th Int. Conf. Software, Knowledge, Inf. Manag. Appl. https://doi.org/10.1109/SKIMA.2014.7083567

Albers, A., Stürmlinger, T., Wantzen, K., Bartosz, Gladysz, Münke, F., 2017. Prediction of the Product Quality of Turned Parts by Real-time Acoustic Emission Indicators. Procedia CIRP 63, 348–353. https://doi.org/10.1016/j.procir.2017.03.173

Ali, M.A.H., Lun, A.K., 2018. A cascading fuzzy logic with image processing algorithm – based defect detection for automatic visual inspection of industrial cylindrical object ’ s surface. Int. J. Adv. Manuf. Technol.

Alvarez, I., Marina, J., Enguita, J.M., Fraga, C., Garcia, R., 2009. Industrial online surface defects detection in continuous casting hot slabs. Proc. SPIE 7389, 73891X. https://doi.org/10.1117/12.827532

Apte, C., Weiss, S., Grout, G., 1993. Predicting defects in disk drive manufacturing: A case study in high-dimensional classification. Proc. 9th IEEE Conf. Artif. Intell. Appl. 212–218. https://doi.org/10.1109/CAIA.1993.366608

Arai, T., Nakasu, N., Yoshimura, K., Edamura, T., 2009. In-line automatic defect repair system for TFT-LCD production. J. Inf. Disp. 10, 202–205. https://doi.org/10.1080/15980316.2009.9652108

Arita, S., Takimoto, H., Yamauchi, H., Kanagawa, A., 2014. Automatic Detection Method for Casting Defects. Adconp 179–183.

Arsenović, M., Pezo, L., Stanković, S., Radojević, Z., 2015. Factor space differentiation of brick clays according to mineral content: Prediction of final brick product quality. Appl. Clay Sci. 115, 108–114. https://doi.org/10.1016/j.clay.2015.07.030

Bai, X., Fang, Y., Lin, W., Wang, L., Ju, B.F., 2014. Saliency-based defect detection in industrial images by using phase spectrum. IEEE Trans. Ind. Informatics 10, 2135–2145. https://doi.org/10.1109/TII.2014.2359416

Bainbridge, H., Mcgrath, B., 2004. HYDROGEN FABRICATION CRACKING : HSE ’ s INDUSTRIAL EXPERIENCE , AND RESEARCH INTO DEFECT DETECTION WITH A NUMBER OF NDT TECHNIQUES, in: SYMPOSIUM SERIES. pp. 1–14.

Bakhadyrov, I., Jafari, M.A., Fang, T., Safari, A., Danforth, S., Langrana, N., 1998. Defect detection in indirect layered manufacturing, in: Proceedings of the IEEE International Conference on Systems, Man and Cybernetics. pp. 4251–4254. https://doi.org/10.1109/ICSMC.1998.727513

Baldassarre, A., De Lucia, M., Rossi, F., Vannucci, M., 2000. Quality control in cloth production: a new system for real-time defect detection. Proc. SPIE 45–54. https://doi.org/10.1117/12.417246

Barnes, R., 1996. Hybrid-based PLC control predicts, optimizes product quality. Control Eng. 43.

Barton, R.S., Himmelblau, D.M., 1997. On-line Prediction of Polymer Product Quality in an Industrial Reactor using Recurrent Neural Networks, in: IEEE International Conference on Neural Networks. pp. 111–114. https://doi.org/10.1109/WIIAT.2008.376

Belnoue, J.P.H., Mesogitis, T., Nixon-Pearson, O.J., Kratz, J., Ivanov, D.S., Partridge, I.K., Potter, K.D., Hallett, S.R., 2017. Understanding and predicting defect formation in automated fibre placement pre-preg laminates. Compos. Part A Appl. Sci. Manuf. 102, 196–206. https://doi.org/10.1016/j.compositesa.2017.08.008

Benedetti, M., Donelli, M., Pastorino, M., Rosani, A., Massa, A., 2006. Detection of multiple defects in industrial products by means of a non-destructive microwave approach. Eur. Sp. Agency, (Special Publ. ESA SP, 626 SP 6.

Berger, D., Brabandt, D., Bakir, C., Hornung, T., Lanza, G., Summa, J., Schwarz, M., Herrmann, H.G., Pohl, M., Stommel, M., 2017. Effects of defects in series production of hybrid CFRP lightweight components – detection and evaluation of quality critical characteristics. Meas. J. Int. Meas. Confed. 95, 389–394. https://doi.org/10.1016/j.measurement.2016.10.003

Berget, I., Naes, T., 2002. Optimal sorting of raw materials, based on the predicted end-product quality. Qual. Eng. 14, 459–478. https://doi.org/10.1081/QEN-120001883

Besse, P., Le Gall, C., 2006. Application and reliability of change-point analyses for detecting a defective stage in integrated circuit manufacturing. Commun. Stat. Simul. Comput. 35, 479–496. https://doi.org/10.1080/03610910600591602

Birlutiu, A., Burlacu, A., Kadar, M., Onita, D., 2017. Defect Detection in Porcelain Industry Based on Deep Learning Techniques. 2017 19th Int. Symp. Symb. Numer. Algorithms Sci. Comput. 263–270. https://doi.org/10.1109/SYNASC.2017.00049

Bissi, L., Baruffa, G., Placidi, P., Ricci, E., Scorzoni, A., Valigi, P., 2013. Automated defect detection in uniform and structured fabrics using Gabor filters and PCA. J. Vis. Commun. Image Represent. 24, 838–845. https://doi.org/10.1016/j.jvcir.2013.05.011

Blake, S., 2010. Integrated Repair Systems for Composite Manufacturing Defects , Mro and Field Applications, in: International SAMPE Symposium and Exhibition.

Borselli, A., Colla, V., Vannucci, M., Veroli, M., 2010. A fuzzy inference system applied to defect detection in flat steel production. 2010 IEEE World Congr. Comput. Intell. WCCI 2010. https://doi.org/10.1109/FUZZY.2010.5584036

Budenkov, G.A., Nedzvetskaya, O.V., Lebedeva, T.N., 2004. Technology for defect detection in equipment in metal and petroleum-producing industries. Tyazheloe Mashinostr. 11, 28–30.

Bulnes, F.G., Usamentiaga, R., Garcia, D.F., Molleda, J., 2016. An efficient method for defect detection during the manufacturing of web materials. J. Intell. Manuf. 27, 431–445. https://doi.org/10.1007/s10845-014-0876-9

Bulychev, O.A., Shleenkov, S.A., Lisienko, V.G., Shleenkov, A.S., 2010. A study of the possibility of detecting surface defects in ferromagnetic products using a pyroelectromagnetic method. Russ. J. Nondestruct. Test. 46, 274–280. https://doi.org/10.1134/S1061830910040054

Cabral, J.D.D., de Araújo, S.A., 2015. An intelligent vision system for detecting defects in glass products for packaging and domestic use. Int. J. Adv. Manuf. Technol. 77, 485–494. https://doi.org/10.1007/s00170-014-6442-y

Caggiano, A., Perez, R., Segreto, T., Teti, R., Xirouchakis, P., 2016. Advanced Sensor Signal Feature Extraction and Pattern Recognition for Wire EDM Process Monitoring. Procedia CIRP 42, 34–39. https://doi.org/10.1016/j.procir.2016.02.181

Caggiano, A., Teti, R., Perez, R., Xirouchakis, P., 2015. Wire EDM monitoring for zero-defect manufacturing based on advanced sensor signal processing. Procedia CIRP 33, 315–320. https://doi.org/10.1016/j.procir.2015.06.065

Calderón-Martinez, J.A., Campoy-Cervera, P., 2003. Defects detection in continuous manufacturing by means of convolutional neural networks. Lect. Notes Comput. Sci. (including Subser. Lect. Notes Artif. Intell. Lect. Notes Bioinformatics) 2687, 528–535.

Capell, T.F., Palaniappan, J., Ogin, S.L., Thorne, A.M., Reed, G.T., Crocombe, A.D., Tjin, S.C., Wang, Y., Guo, Y., 2009. Detection of defects in as manufactured GFRP–GFRP and CFRP–CFRP composite bonded joints using chirped fibre Bragg grating sensors. Plast. Rubber Compos. 38, 138–145. https://doi.org/10.1179/174328909X387973

Caron, J., Duvieubourg, L., King, L., France, C.C., 1997a. Defect detection by recursive filters in packaging industry, in: International Conference on Information, Communications and Signal Processing ICICS. pp. 9–12.

Caron, J., Duvieubourg, L., Postaire, J.G., 1997b. An hyperbolic filter for defect detection in the packaging industry. QCAV 97. 1997 Int. Conf. Qual. Control by Artif. Vis.

Centobelli, P., Teti, R., Andersen, L.A., 2015. Sensor monitoring during tack welding of aerospace components. Procedia CIRP 33, 327–332. https://doi.org/10.1016/j.procir.2015.06.072

Cerniglia, D., Montinaro, N., 2018. Defect Detection in Additively Manufactured Components: Laser Ultrasound and Laser Thermography Comparison. Procedia Struct. Integr. 8, 154–162. https://doi.org/10.1016/j.prostr.2017.12.016

Chan, Y.C., Yeung, F., 1995. Nondestructive Detection of Defects in Miniaturized Multilayer Ceramic Capacitors Using Digital Speckle Correlation Techniques. Trans. Components, Packag. Manuf. Technol. Part A 18, 218–223. https://doi.org/10.1109/95.465169

Chen, W., Tseng, S., Wang, C., 2004. A Novel Manufacturing Defect Detection Method Using Data Mining Approach, in: International Conference on Industrial, Engineering & Other Applications of Applied Intelligent Systems IEA-AIE. pp. 77–86.

Chen, W.C., Tseng, S.S., Wang, C.Y., 2005. A novel manufacturing defect detection method using association rule mining techniques. Expert Syst. Appl. 29, 807–815. https://doi.org/10.1016/j.eswa.2005.06.004

Chetouani, Y., 2009. Model-order reduction based on artificial neural networks for accurate prediction of the product quality in a distillation column. Int. J. Autom. Control 3. https://doi.org/10.1504/IJAAC.2009.026780

Chien, C.F., Hsu, S.C., Chen, Y.J., 2013. A system for online detection and classification of wafer bin map defect patterns for manufacturing intelligence. Int. J. Prod. Res. 51, 2324–2338. https://doi.org/10.1080/00207543.2012.737943

Chittilappilly, A.J., Subramaniam, K., 2017. SVM based defect detection for industrial applications. 2017 4th Int. Conf. Adv. Comput. Commun. Syst. ICACCS 2017 2–6. https://doi.org/10.1109/ICACCS.2017.8014696

Cho, W. Il, Park, J.H., Chung, D.H., Choi, S.W., Han, W.S., 2005. The detectability of Qz phase defects and its application for 65nm node CPL mask manufacturing. Proc. SPIE 599205, 599205. https://doi.org/10.1117/12.632335

Choi, G., Kim, S.H., Ha, C., Bae, S.J., 2012. Multi-step ART1 algorithm for recognition of defect patterns on semiconductor wafers. Int. J. Prod. Res. 50, 3274–3287. https://doi.org/10.1080/00207543.2011.574502

Choi, J., Kim, Y., Lee, D., Jung, H., Kim, S., Yim, D., 2015. Investigation of scum type growing defects on attenuated PSM and its prevention, in: Proceedings of SPIE. p. 96351O. https://doi.org/10.1117/12.2196069

Choi, S.S., Cho, O.H., Kim, E.K., 2016. Design of automated screw blade welding defect detection system for image processing-based zero-defect mass-production. Proc. - 2015 Int. Conf. Comput. Sci. Comput. Intell. CSCI 2015 845–846. https://doi.org/10.1109/CSCI.2015.188

Cochran, J.K., Erol, R., 2001. Performance modelling of serial production lines with inspection/repair stations. Int. J. Prod. Res. 39, 1707–1720. https://doi.org/10.1080/00207540010022331

Colledani, M., Coupek, D., Verl, A., Aichele, J., Yemane, A., 2014. Design and evaluation of in-line product repair strategies for defect reduction in the production of electric drives. Procedia CIRP 21, 159–164. https://doi.org/10.1016/j.procir.2014.03.186

Comunale, R.A., Casey, J.D., 1994. Reliability and life testing of color gas plasma display panels manufactured with in-process defect repair technology. Proc. SPIE - Int. Soc. Opt. Eng. 2174. https://doi.org/10.1117/12.172136

Crouch, I.G., Kesharaju, M., Nagarajah, R., 2015. Characterisation, significance and detection of manufacturing defects in Reaction Sintered Silicon Carbide armour materials. Ceram. Int. 41, 11581–11591. https://doi.org/10.1016/j.ceramint.2015.06.083

Daley, W., Carey, R., Thompson, C., 1995. Real-time color grading and defect detection of food products. Proc. SPIE - Int. Soc. Opt. Eng. 2345, 403–411.

Dangora, L.M., Mitchell, C.J., Sherwood, J.A., 2015. Predictive model for the detection of out-of-plane defects formed during textile-composite manufacture. Compos. Part A Appl. Sci. Manuf. 78, 102–112. https://doi.org/10.1016/j.compositesa.2015.07.011

Dangora, L.M., Sherwood, J.A., Gorczyca, J.L., Mitchell, C.J., 2014. Finite Element Modeling to Predict the Formation of Out-of-Plane Defects during the Manufacture of Textile-Reinforced Composites, in: Proceedings of the American Society for Composites - 29th Technical Conference, ASC 2014.

Das, B., Bag, S., Pal, S., 2016. Defect detection in friction stir welding process through characterization of signals by fractal dimension. Manuf. Lett. 7, 6–10. https://doi.org/10.1016/j.mfglet.2015.11.006

Das, P.K., Weber, A.Z., Bender, G., Manak, A., Bittinat, D., Herring, A.M., Ulsh, M., 2014. Rapid detection of defects in fuel-cell electrodes using infrared reactive-flow-through technique. J. Power Sources 261, 401–411. https://doi.org/10.1016/j.jpowsour.2013.11.124

De Oliveira, B.C.F., Pacheco, A.L.S., Flesch, R.C.C., Demay, M.B., 2017. Detection of defects in the manufacturing of electric motor stators using vision systems: Electrical connectors. 2016 12th IEEE Int. Conf. Ind. Appl. INDUSCON 2016. https://doi.org/10.1109/INDUSCON.2016.7874551

Densitks, P.D., Manufacturing, A.H.V., Increasing, F.F.O.R., 1995. Monitoring and predicting defect densities in a high volume manufacturing facility for increasing yields. Inst. Electr. Eng. M, 1–3.

Depalo, A., Barolo, M., Bezzo, F., Muradore, R., 2015. Phase identification for product quality prediction in batch processes: Application to industrial resin production. 2015 Eur. Control Conf. ECC 2015 3496–3501. https://doi.org/10.1109/ECC.2015.7331075

Douglas, C.C., Deng, L., Efendiev, Y., Haase, G., Kucher, A., Lodder, R., Qin, G., 2010. Advantages of Multiscale Detection of Defective Pills during Manufacturing, in: 2nd International Conference on High Performance Computing and Applications. Springer, Berlin, Heidelberg, pp. 8–16. https://doi.org/10.1007/978-3-642-11842-5_2

Douglas, C.C., Deng, L., Efendiev, Y., Haase, G., Kucher, A., Lodder, R.A., 2012. Real-time multiscale detection of defective pills during manufacturing. Int. J. Numer. Anal. Model. 9, 169–180. https://doi.org/10.1007/978-3-642-11842-5_2

Douglas, C.C., Hannel, T., Link, D., Lodder, R.A., 2009. A Prototype for Detecting Defective Pills During Manufacturing, in: 8th International Symposium on Distributed Computing and Applications to Business, Engineering and Science. p. 107.

Dralla, J.R., Hoff, J.C., Lee, A.H., 1987. Automated Submicrometer Defect Detection During VLSI Circuit Production. Proc. SPIE 218. https://doi.org/10.1117/12.940431

Du, W., Bai, Q., Wang, Y., Zhang, B., 2017. Eddy current detection of subsurface defects for additive / subtractive hybrid manufacturing. Int. J. Adv. Manuf. Technol. 95, 3185–3195. https://doi.org/https://doi.org/10.1007/s00170-017-1354-2

Dubov, A.A., 2015. Detection of Metallurgical and Production Defects in Engineering Components Using Metal Magnetic Memory. Metallurgist 59, 164–167. https://doi.org/10.1007/s11015-015-0078-5

Dudas, C., Boström, H., 2009. Using uncertain chemical and thermal data to predict product quality in a casting process. KDD Work. Knowl. Discov. from Uncertain Data 57–61. https://doi.org/10.1145/1610555.1610563

Dunlop, E.D., Halton, D., 2004. Radiometric pulse and thermal imaging methods for the detection of physical defects in solar cells and Si wafers in a production environment. Sol. Energy Mater. Sol. Cells 82, 467–480. https://doi.org/10.1016/j.solmat.2004.02.003

Duvieusbourg, L., Taleb-Ahmed, A., Caron, J., Postaire, J.G., 1999. Analyze of recursive filters for the detection of defects on flat product. QCAV99. 5th Int. Conf. Qual. Control by Artif. Vision. Proc.

Eberle, L., Svensson, A., Graser, A., Luemkemann, J., Sugiyama, H., Schmidt, R., Hungerbuehler, K., 2017. Innovative approach for identifying root causes of glass defects in sterile drug product manufacturing. Eur. J. Pharm. Sci. 104, 162–170. https://doi.org/10.1016/j.ejps.2017.03.015

Fadhil, A.A., Ghattas, M.S., Iskander, B.A., Ajeel, S.A., Enab, T.A., 2018. Structural characterization and detecting processes of defects in leaded brass alloy used for gas valves production. Alexandria Eng. J. 57, 1301–1311. https://doi.org/10.1016/j.aej.2017.04.017

Fang, T., Bakhadyrov, I., Jafari, M.A., Alpan, G., 1998a. Online detection of defects in layered manufacturing, in: International Conference on Robotics & Automation. pp. 0–5.

Fang, T., Jafari, M.A., Bakhadyrov, I., Safari, A., Danforth, S., Langrana, N., 1998b. Online defect detection in layered manufacturing using process signature. SMC’98 Conf. Proceedings. 1998 IEEE Int. Conf. Syst. Man, Cybern. (Cat. No.98CH36218). https://doi.org/10.1109/ICSMC.1998.727536

Fang, T., Jafari, M.A., Danforth, S., Safari, A., 2003. Signature analysis and defect detection in layered manufacturing of ceramic sensors and actuators. Mach. Vis. Appl. 15, 63–75. https://doi.org/10.1007/s00138-002-0074-1

Ferguson, M., Ak, R., Lee, Y.-T.T., Law, K.H., 2018. Detection and Segmentation of Manufacturing Defects with Convolutional Neural Networks and Transfer Learning. ASTM Int. 2, 137–164. https://doi.org/10.1520/SSMS20180033

Fetfatsidis, K.A., Sherwood, J.A., 2011. Simulation of the manufacturing of non-crimp fabric-reinforced composite wind turbine blades to predict the formation of wave defects. AIP Conf. Proc. 1353, 895–900. https://doi.org/10.1063/1.3589629

Fike, D.K., 1991. Using IR thermography as a manufacturing tool to analyze and repair defects in printed circuit boards. Proc. SPIE 1467, 150–153. https://doi.org/10.1117/12.46431

Forejtová, L., Zavadil, T., Kolařík, L., Kolaříková, M., 2018. Defect detection of resistence spot welds used in automotive industry by non-destructive testing, in: 27th International Conference on Metallurgy and Materials. pp. 688–693.

Fox, J.C., Kim, F., Reese, Z., Evans, C., Taylor, J.S., 2018. COMPLEMENTARY USE OF OPTICAL METROLOGY AND X-RAY COMPUTED TOMOGRAPHY FOR SURFACE FINISH AND DEFECT DETECTION IN LASER POWDER BED FUSION ADDITIVE MANUFACTURING, in: 2018 ASPE and Euspen Summer Topical Meeting. pp. 195–200.

Franke, D., Schmitz, M., 2017. New fexibility in 3D digitalisation and defect detection for batch composite production. JEC Compos. Mag. 54, 25–26.

Friedman, Y.Z., Neto, E.A., Porfirio, C.R., 2002. First-principles distillation inference models for product quality prediction. Hydrocarb. Process. 81, 53–58.

Fu, M.W., Yong, M.S., 2009. Simulation-enabled casting product defect prediction in die casting process. Int. J. Prod. Res. 47, 5203–5216. https://doi.org/10.1080/00207540801935616

Furtado, L.F.F., Trabasso, L.G., Villani, E., Francisco, A., 2012. Temporal filter applied to image sequences acquired by an industrial robot to detect defects in large aluminum surfaces areas. Proc. 15th Int. Conf. Mechatronics, MECHATRONIKA 2012.

Gao, P.F., Fan, X.G., Zhan, M., Lei, Z.N., Cai, Y., 2017. Formation mechanism, prediction and control of the forming defects in transitional region during local loading forming of Ti-alloy rib-web component. Procedia Eng. 207, 472–477. https://doi.org/10.1016/j.proeng.2017.10.807

Garcia, M., Garcia, D.F., Diaz, J.L., Suarez, F., 1994. Flatness defects detection in rolling products with real-time vision system. IEE Conf. Publ. n 395, 407–412.

García, V., Sánchez, J.S., Rodríguez-Picón, L.A., Méndez-González, L.C., Ochoa-Domínguez, H.D.J., 2018. Using regression models for predicting the product quality in a tubing extrusion process. J. Intell. Manuf. 1–10. https://doi.org/10.1007/s10845-018-1418-7

Gayer, A., Saya, A., 1988. The use of X-radiography and computer software for detecting defects during the manufacture of steel-belt tyres. NDT Int. 21, 333–336. https://doi.org/10.1016/0308-9126(88)90192-7

Ge, Q., Fang, M., Xu, J., 2018. Defect Detection of Industrial Products based on Improved Hough Transform. Int. Conf. Mechatronics Autom. 1, 832–836.

Ge, Z., Song, Z., Gao, F., 2012. Statistical Prediction of Product Quality in Batch Processes with Limited Batch-Cycle Data. Ind. Eng. Chem. Res. 51, 11409–11416. https://doi.org/10.1021/ie202554r

Gebus, S., Juuso, E., 2002. Industrial utilization of linguistic equations for defect detection on printed circuit boards. IECON Proc. (Industrial Electron. Conf. 3, 1887–1892. https://doi.org/10.1109/IECON.2002.1185259

Geinitz, S., Wedel, A., Margraf, A., 2016. Online Detection and Categorisation of Defects Along Carbon Fibre Production Using a High Resolution , High Width Line Scan Vision System, in: ECCM 2016 - Proceeding of the 17th European Conference on Composite Materials.

Genta, G., Galetto, M., Franceschini, F., 2018. Product complexity and design of inspection strategies for assembly manufacturing processes. Int. J. Prod. Res. 56, 4056–4066. https://doi.org/10.1080/00207543.2018.1430907

Geveaux, P., Kohler, S., Miteran, J., Truchetet, F., 1998. Searching method for an optimal lighting application for defect detection by artificial vision in industrial field, in: Proceedings of SPIE. pp. 124–129. https://doi.org/10.1117/12.325755

Geveaux, P., Kohler, S., Miteran, J., Truchetet, F., Meriaudeau, F., 2000. Comparison between two classification methods: application to defects detection by artificial vision in industrial field, in: Proceedings of SPIE. pp. 154–161. https://doi.org/10.1117/12.380069

Ghorai, S., Mukherjee, A., Gangadaran, M., Dutta, P.K., 2013. Automatic Defect Detection on Hot-Rolled Flat Steel Products. Ieee Trans. Instrum. Meas. 62, 612–621. https://doi.org/Doi 10.1109/Tim.2012.2218677

Gierl-Mayer, C., Momeni, M., Danninger, H., Iovea, M., Mateiasi, G., Clarke, A., Nicholson, I., 2013. Production of ferrous PM-Parts for calibration and demonstration of typical defect detection performance of in-line x-ray digital radiography equipment, in: International Powder Metallurgy Congress and Exhibition, Euro PM 2013.

Giles, A., Liuping Wang, Chessari, C., 2003. Soft sensor design for prediction of product quality attributes. Proc. IASTED Int. Conf. Intell. Syst. Control.

Gobert, C., Reutzel, E.W., Petrich, J., Nassar, A.R., Phoha, S., 2018. Application of supervised machine learning for defect detection during metallic powder bed fusion additive manufacturing using high resolution imaging. Addit. Manuf. 21, 517–528. https://doi.org/10.1016/j.addma.2018.04.005

Goebbels, K., Ferrano, G., 1988. Automation of Surface Defect Detection and Evaluation, in: Proceedings of SPIE. pp. 2762–2773. https://doi.org/10.1016/B978-0-08-036221-2.50070-X

Grabchenko, A.I., Romashov, D. V., Fedorenko, D.O., Fedorovich, V.A., Mamalis, A.G., Kundrak, J., 2012. Prevention of manufacturing defects of diamond composite materials by simulating the process at the micro level. Nanotechnol. Perceptions 8, 171–180. https://doi.org/10.4024/N16GR12A.ntp.08.03

Grindle, S., Bilodeau, M., Otis, M., 1999. Evaluation of a Fast Defect Detection Tool to Disposition Product Wafers with Large Defects in Printed Photoresist, in: SEMl Advanced Semiconductor Manufacturing Conference. pp. 1036–1037. https://doi.org/10.1093/molbev/msu275

Guotang, B., Yuansong, C., Renchao, Q., 2007. A Defect Detection Method Based on Zernike Moments for Industrial CT Image, in: International Conference on Electronic Measurement and Instruments ICEMI’2007. pp. 831–835.

Gurieva, T.M., 1996. nuclear materials The methods of detection and the analysis of welded and brazed joint. J. Nucl. Mater. 237, 918–921.

Guzenkov, S.A., Fedorov, D.N., 2007. PREDICTING THE EFFECT OF STEELMAKING FACTORS ON THE FORMATION OF DEFECTS IN ROLLED PRODUCTS. Metallurgist 51, 9–10.

Haff, R.P., Toyofuku, N., 2008. X-ray detection of defects and contaminants in the food industry. Sens. Instrum. Food Qual. Saf. 2, 262–273. https://doi.org/10.1007/s11694-008-9059-8

Hajimowlana, H., 2003. Compact web manufacturing process defect-detection system uses a camera and ADI Blackfin processor. Analog Dialogue 37.

Halabe, U.B., Gopalakrishnan, B., Jadeja, J., 2011. Advanced lumber manufacturing model for increasing yield in sawmills using GPR-based defect detection system. Int. J. Adv. Manuf. Technol. 56, 649–661. https://doi.org/10.1007/s00170-011-3205-x

Hamamoto, K., Kitamura, A., Taguchi, S., Watanabe, S., Matsuno, H., 2016. Defect Cause Search Support System Using Ontology and Bayesian Network in Liquid Crystal Display Manufacturing Process. Procedia Comput. Sci. 96, 859–868. https://doi.org/https://doi.org/10.1016/j.procs.2016.08.264

Hannachi, A., Kohler, S., Lallement, A., Hirsch, E., 2015. A comparative study of multi-sensor data fusion methods for highly accurate assessment of manufactured parts. Proc. SPIE - Int. Soc. Opt. Eng. 9534. https://doi.org/10.1117/12.2182832

Hansen, T., Petersen, M.A., Byrne, D. V., 2005. Sensory based quality control utilising an electronic nose and GC-MS analyses to predict end-product quality from raw materials. Meat Sci. 69, 621–634. https://doi.org/10.1016/j.meatsci.2003.11.024

Haq, A.U., Djurdjanovic, D., 2016. Virtual Metrology Concept for Predicting Defect Levels in Semiconductor Manufacturing. Procedia CIRP 57, 580–584. https://doi.org/10.1016/j.procir.2016.11.100

Hascoët, J.Y., Touzé, S., Rauch, M., 2018. Automated identification of defect geometry for metallic part repair by an additive manufacturing process. Weld. World 62, 229–241. https://doi.org/10.1007/s40194-017-0523-0

Haunschild, J., Reis, I.E., Geilker, J., Rein, S., 2011. Detecting efficiency-limiting defects in Czochralski-grown silicon wafers in solar cell production using photoluminescence imaging. Phys. Status Solidi - Rapid Res. Lett. 5, 199–201. https://doi.org/10.1002/pssr.201105183

He Fuqiang, Wang Wen, Chen Zichen, 2006. Automatic defects detection based on adaptive wavelet packets for leather manufacture, in: International Technology and Innovation Conference 2006 (ITIC 2006). IEE, pp. 2024–2027. https://doi.org/10.1049/cp:20061102

He, X.J., Yi, Z. Di, Liu, J., Wang, Y.Z., 2014. Defect Detecting Technology Based on Machine Vision of Industrial Parts. Appl. Mech. Mater. 641–642, 1275–1279. https://doi.org/10.4028/www.scientific.net/AMM.641-642.1275

Hermosilla-Lara, S., Piriou, M., Levesque, P., 2008. Infrared flash thermography applied to the external defect detection on HTR fuel particles during the manufacturing process. AIP Conf. Proc. 975, 1659–1666. https://doi.org/10.1063/1.2902636

Hidaka, K., Ohmori, H., Sano, A., 2006. Adaptive control design for linear time-varying system based on internal model principle, in: IET Conference Publications. pp. 2024–2027. https://doi.org/10.1049/cp

Hirschl, C., Arnold, T., Meislitzer, S., Moldaschi, T., De Biasio, M., Neumaier, L., Molzbicher, A., 2018. Defect detection in high quality polymers used in the semiconductor manufacturing industry. Int. Conf. Exhib. Integr. 286–292.

Hocenski, Ž., Matić, T., Vidović, I., 2016. Technology transfer of computer vision defect detection to ceramic tiles industry. Proc. 2016 Int. Conf. Smart Syst. Technol. SST 2016 301–305. https://doi.org/10.1109/SST.2016.7765678

Hodbe, G.A., Shinde, B.R., 2018. Design and Simulation of LM 25 Sand Casting for Defect Minimization. Mater. Today Proc. 5, 4489–4497. https://doi.org/10.1016/j.matpr.2017.12.018

Holzmond, O., Li, X., 2017. In situ real time defect detection of 3D printed parts. Addit. Manuf. 17, 135–142. https://doi.org/10.1016/j.addma.2017.08.003

Honoki, H., Nakasu, N., Arai, T., Yoshimura, K., Edamura, T., 2007. In-line Automatic Defect Inspection and Repair Method for a High Yield TFT Array Production. ECS Trans. 8, 267–272. https://doi.org/10.1149/1.2767319

Hossain, M.S.J., Sarker, B.R., 2016. Optimal locations of on-line and off-line rework stations in a serial production system. Int. J. Prod. Res. 54, 3603–3621. https://doi.org/10.1080/00207543.2015.1117676

Howard, W.B., Pomeroy, S., Moses, R., Thaler, T., 2007. Production evaluation of automated reticle defect printability prediction application - art. no. 65330A. EMLC 2007 23rd Eur. Mask Lithogr. Conf. 6533, A5330–A5330. https://doi.org/65330a\r10.1117/12.736495

Hroundas, G., 1987. PCB test data analysis for product defect prevention. Proc. AUTOTESTCON ’87. IEEE Int. Autom. Test. Conf. `Bridging Stand. to Adv. Technol. (Cat. No.87CH2510-6).

Hudson, T.B., Hou, T.-H., Grimsley, B.W., Yuan, F.-G., 2015. Detection of CFRP composite manufacturing defects using a guided wave approach, in: International SAMPE Technical Conference.

Huertas Quintero, L.A.M., West, A.A., Velandia, D.M.S., Conway, P.P., Wilson, A., 2010. Integrated simulation tool for quality support in the low-volume high-complexity electronics manufacturing domain. Int. J. Prod. Res. 48, 45–68. https://doi.org/10.1080/00207540802427886

Hussain, B., El-Gizawy, A.S., 2016. Development of 3D Finite Element Model for Predicting Process-Induced Defects in Additive Manufacturing by Selective Laser Melting (SLM), in: Volume 2: Advanced Manufacturing. ASME, p. V002T02A065. https://doi.org/10.1115/IMECE2016-66245

Jancikova, Z., Zimny, O., Kvicala, M., Kostial, P., Meca, R., 2013. Prediction of internal defects in rolled products from cr-mo steels using artificial intelligence methods. Met. 2013 - 22nd Int. Conf. Metall. Mater. Conf. Proc. 1932–1937.

Jeong, J.-M., Min, K.-E., Kim, M.-S., Park, J.-M., 2018. Development of defects detecting system for corrugated board , mill application , and changes of production defects ratio. J. Korea Tech. Assoc. Pulp Pap. Ind. 40, 37–42.

Jian, C., Gao, J., Ao, Y., 2017. Automatic surface defect detection for mobile phone screen glass based on machine vision. Appl. Soft Comput. J. 52, 348–358. https://doi.org/10.1016/j.asoc.2016.10.030

Jin, G.Q., Yan, T., Chen, C.F., 2014. Study on the Causes and Prevention Measures of Shrinkage Defects of Heavy V-Belt Pulley in the Production. Appl. Mech. Mater. 722, 231–234. https://doi.org/10.4028/www.scientific.net/AMM.722.231

Jing, Y., Liang, G.Q., 2013. Exploiting manufacturing knowledge to support decision-making for mechanical product defect prevention. Int. Conf. Manag. Sci. Eng. - Annu. Conf. Proc. 532–538. https://doi.org/10.1109/ICMSE.2013.6586332

Ju, F., Li, J., Xiao, G., Arinez, J., 2013. Quality flow model in automotive paint shops. Int. J. Prod. Res. 51, 6470–6483. https://doi.org/10.1080/00207543.2013.824629

Jung, T., Herrera, L., Schölkopf, B., 2005. Long Term Prediction of Product Quality in a Glass Manufacturing Process Using a Kernel Based Approach. Proc. 8th Int. Work. Artif. Neural Networks (Computational Intell. Bioinspired Syst. LNCS 3512, 960–967. https://doi.org/10.1007/11494669_118

Kakimoto, A., 1996. Detection of surface defects on steel ball bearings in production process using a capacitive sensor. Meas. J. Int. Meas. Confed. 17, 51–57. https://doi.org/10.1016/0263-2241(96)00007-3

Kanko, J.A., Sibley, A.P., Fraser, J.M., 2016. In situ morphology-based defect detection of selective laser melting through inline coherent imaging. J. Mater. Process. Technol. 231, 488–500. https://doi.org/10.1016/j.jmatprotec.2015.12.024

Karimi, M.H., Asemani, D., 2014. Surface defect detection in tiling Industries using digital image processing methods: Analysis and evaluation. ISA Trans. 53, 834–844. https://doi.org/10.1016/j.isatra.2013.11.015

Karunakar, D.B., Datta, G.L., 2008. Prevention of defects in castings using back propagation neural networks. Int. J. Adv. Manuf. Technol. 39, 1111–1124. https://doi.org/10.1007/s00170-007-1289-0

Kehoe Parker, G.A., LeBlanc, A., A., 1989. Image processing for automatic defect detection in industrial radiographic images. 3rd Int. Conf. Image Process. its Appl. 202–206.

Kim, J.-M., Hur, I.-B., Lee, D.-H., Choi, S.-S., 2012. A simulation of chrome migration and its prevention in photomask. Proc. SPIE 844104, 844104. https://doi.org/10.1117/12.977217

Kluska-Nawarecka, S., Jancikova, Z., David, J., Wilk-Kolstrok, D., Regulski, K., Dajda, J., 2014. Knowledge components description, support to prevent defects of metal products using methods based on artificial intelligence and ETL technologies. Met. 2014 - 23rd Int. Conf. Metall. Mater. Conf. Proc. 1451–1457.

Klute, S.M., Sang, A.K., Gifford, D.K., Froggatt, M.E., 2011. Defect detection during manufacture of composite wind turbine blade with embedded fiber optic distributed strain sensor, in: Proceedings of the SAMPE Tech Conference and Exhibition: Developing Scalable Materials and Processes for Our Future. p. 15.

Kocar, O., Ozkan, S., Karayel, D., Eldogan, O., 2012. Prediction and control of product quality in deep drawing process: Design and implementation of an intelligent system using knowledge technologies. Steel Res. Int. SPL. ISSUE, 1323–1326.

Kohler, S., Geveaux, P., Miteran, J., 2001. New filter for detecting defects on industrial parts by artificial vision, in: Proceedings of SPIE. pp. 73–83. https://doi.org/10.1117/12.420899

KORABI, T.E., Graton, G., El Adel, E.M., Ouladsine, M., Pinaton, J., 2018. A Bayesian indicator for Run-to-Run performance assessment in semiconductor manufacturing. 2018 14th Conf. Ph.D. Res. Microelectron. Electron. 53–56. https://doi.org/10.1109/PRIME.2018.8430365

Kostal, H., Kreysar, D., Pedeville, G., Rykowski, R., Berkel, C., 2010. Automated , high-speed methods for display defect detection and classification for production quality control Keywords : On-display, in: Proceedings of International Meeting on Information Display. pp. 398–399. https://doi.org/10.1149/1.3160549

Krugh, M., Antani, K., Mears, L., Schulte, J., 2016. Prediction of Defect Propensity for the Manual Assembly of Automotive Electrical Connectors. Procedia Manuf. 5, 144–157. https://doi.org/10.1016/j.promfg.2016.08.014

Krysinski, A., Coupland, J.M., Leach, R.K., Flockhart, G.M.H., 2014. A simple defect detection technique for high speed roll-to-roll manufacturing, in: 14th International Conference of the European Society for Precision Engineering and Nanotechnology, EUSPEN 2014. pp. 149–152.

Kulkarni, A., Vidvans, A., Rifat, M., Bicknell, G., Gong, X., Manogharan, G., Terpenny, J., Basu, S., 2018. Scalable Detection of Defects in Additively Manufactured PLA Components, in: Volume 1: Additive Manufacturing; Bio and Sustainable Manufacturing. ASME, p. V001T01A042. https://doi.org/10.1115/MSEC2018-6623

Kuo, C.F., Hsu, C.T.M., Fang, C.H., Chao, S.M., Lin, Y. De, 2013. Automatic defect inspection system of colour filters using Taguchi-based neural network. Int. J. Prod. Res. 51, 1464–1476. https://doi.org/10.1080/00207543.2012.695877

Kurpiel, F.T., Onesti, L., 2006. Computer vision defect detection: Ten years of experience with the composite laminate panel, flooring, furniture industry, in: TAPPI Decorative and Industrial Laminates Symposium. p. 14.

Kwon, Y.J., Kim, D.H., 2017. IoT-based defect predictive manufacturing systems. Int. Conf. Inf. Commun. Technol. Converg. ICT Converg. Technol. Lead. Fourth Ind. Revolution, ICTC 2017 2017–Decem, 1067–1069. https://doi.org/10.1109/ICTC.2017.8190856

Lawson, S.W., 1996. Automatic detection of defects in industrial ultrasound images using a neural network. Proc. SPIE 2786, 37–47. https://doi.org/10.1117/12.248579

Lee, L., Pham, M., Pham, D., Khaja, M., Hennessey, K.A., Miller, J., 2002. Implementing fully automatic macro defect detection and classification system in high-production semiconductor fab, in: Proceedings of SPIE. p. 783. https://doi.org/10.1117/12.473524

Lei, J., Gao, X., Feng, Z., Qiu, H., Song, M., 2018. Scale insensitive and focus driven mobile screen defect detection in industry. Neurocomputing 294, 72–81. https://doi.org/10.1016/j.neucom.2018.03.013

Li, J., Chen, R., Ma, Y., Ke, W., 2014. Characterization and prediction of microporosity defect in sand cast WE54 alloy castings. J. Mater. Sci. Technol. 30, 991–997. https://doi.org/10.1016/j.jmst.2014.03.011

Li, X., Strojwas, A., Reddy, M., Milor, L., Lin, Y.-T., 1997. Modeling of defect propagation/growth for early yield impact prediction in VLSI fabrication. Adv. Semicond. Manuf. Conf. Work. 263–268. https://doi.org/10.1109/ASMC.1997.630746

Li, X., Strojwas, A., Sweckef, A., Milo, L., 1997a. A Study of Defect PropagatiodGrowth for VLSI Manufacturing Yield Impact Prediction, in: In Semiconductor Manufacturing Conference Proceedings. IEEE, pp. E31–E34.

Li, X., Strojwas, A., Swecker, A., Milor, L., 1997b. Study of defect propagation / growth for VLSI manufacturing yield impact prediction, in: IEEE International Symposium on Semiconductor Manufacturing Conference. pp. 31–34.

Lian, X., 2018. Product Surface Defects Detection Based on Multiple - Kernel Learning Feature Fusion Method. 2018 IEEE Int. Conf. Intell. Robot. Control Eng. 247–251.

Lien, P.C., Zhao, Q., 2018. Product Surface Defect Detection Based on Deep Learning. 2018 IEEE 16th Intl Conf Dependable, Auton. Secur. Comput. 16th Intl Conf Pervasive Intell. Comput. 4th Intl Conf Big Data Intell. Comput. Cyber Sci. Technol. Congr. 250–255. https://doi.org/10.1109/DASC/PiCom/DataCom/CyberSciTec.2018.00051

Lin, H.-P., Lee, C.-H., Lo, Y.-C., Liao, C.-H., Lu, K.-L., 1997. Verifying and preventing recurrence in metal defects for VLSI manufacturing, in: Proceedings of SPIE. pp. 50–61. https://doi.org/10.1117/12.284649

Litunovsky, N., Alekseenko, E., Kuznetsov, V., Lyanzberg, D., Makhankov, A., Rulev, R., 2013. Repair of manufacturing defects in the armor of plasma facing units of the ITER Divertor Dome. Fusion Eng. Des. 88, 1739–1743. https://doi.org/10.1016/j.fusengdes.2013.04.043

Liu, B., Wu, S., Zou, S., 2010. Automatic detection technology of surface defects on plastic products based on machine vision. 2010 Int. Conf. Mech. Autom. Control Eng. MACE2010 2213–2216. https://doi.org/10.1109/MACE.2010.5536470

Liu, H., 2013. Glass product defects detection method based on machine vision. Sensors and Transducers 25, 85–90.

Liu, X., 2006. Product Quality Prediction with Support Vector Machines, in: Springer. pp. 1126–1131.

Llanos, I., Agirre, A., Urreta, H., 2014. Error detection and correction methodology for quality assurance on laser milled geometries. Procedia CIRP 21, 195–198. https://doi.org/10.1016/j.procir.2014.03.185

Lukovics, I., Cop, J., Fojtl, L., Lukovics, P., Pata, V., 2014. Prediction of surface product quality and operation reliability of grinding machines. Manuf. Technol. 14, 213–217.

Mak, K.L., Peng, P., Yiu, K.F.C., 2009. Fabric defect detection using morphological filters. Image Vis. Comput. 27, 1585–1592. https://doi.org/10.1016/j.imavis.2009.03.007

Malago’, M., Mucchi, E., Dalpiaz, G., 2016. Fault detection in heavy duty wheels by advanced vibration processing techniques and lumped parameter modeling. Mech. Syst. Signal Process. 70–71, 141–160. https://doi.org/10.1016/j.ymssp.2015.09.043

Mapelli, C., Barella, S., Gruttadauria, A., Mombelli, D., Ciuffini, A.F., Cusolito, M., 2018. Defects, their source and detection in wire drawn products. Metall. Ital. 110, 5–10.

Matsuda, J., Koike, M., Yano, H., 1994. Product quality prediction for kneading process in ceramic injection molding. JSME Int. Journal, Ser. C Dyn. Control. Robot. Des. Manuf. 37, 830–835.

Mehta, N.D., Gohil, A. V., Doshi, S.J., 2018. Innovative Support System for Casting Defect Analysis - A Need of Time. Mater. Today Proc. 5, 4156–4161. https://doi.org/10.1016/j.matpr.2017.11.677

Melhem, M., Ananou, B., Djeziri, M., Ouladsine, M., Pinaton, J., 2015. Prediction of the Wafer quality with respect to the production equipments data, in: IFAC-PapersOnLine. pp. 78–84.

Melhem, M., Ananou, B., Ouladsine, M., Combal, M., Pinaton, J., 2017. Product quality prediction using alarm data : AApplication to the semiconductor manufacturing process. 2017 25th Mediterr. Conf. Control Autom. MED 2017 1332–1338. https://doi.org/10.1109/MED.2017.7984303

Melhem, M., Ananou, B., Ouladsine, M., Pinaton, J., 2016a. Regression Methods for Predicting the Product’s Quality in the Semiconductor Manufacturing Process. IFAC-PapersOnLine 49, 83–88. https://doi.org/10.1016/j.ifacol.2016.07.554

Melhem, M., Ananou, B., Ouladsine, M., Pinaton, J., 2016b. Regularized regression models to predict the product quality in multistep manufacturing. 2016 5th Int. Conf. Syst. Control. ICSC 2016 31–36. https://doi.org/10.1109/ICoSC.2016.7507067

Mirman, C., Srinivasan, T., Bibby, Y., 1997. An optical / mechanical testing system for detecting manufacturing defects in glass lenses. J. Eng. Technol. 14, 28–32.

Miura, M., Minami, M., Suzuki, H., Sakaguchi, M., Sugishima, Y., 2002. GA-based detection/evaluation method of minute defects on metal products for on-line inspection. Mem. Fac. Eng. Fukui Univ. 50.

Molina, J., Solanes, J.E., Arnal, L., Tornero, J., 2017. On the detection of defects on specular car body surfaces. Robot. Comput. Integr. Manuf. 48, 263–278. https://doi.org/10.1016/j.rcim.2017.04.009

Montinaro, N., Cerniglia, D., Pitarresi, G., 2018. A numerical and experimental study through laser thermography for defect detection on metal additive manufactured parts. Frat. ed Integrita Strutt. 12, 231–240. https://doi.org/10.3221/IGF-ESIS.43.18

Mota-Grajales, R., Torres-Peña, J.C., Camas-Anzueto, J.L., Pérez-Patricio, M., Grajales Coutiño, R., López-Estrada, F.R., Escobar-Gómez, E.N., Guerra-Crespo, H., 2018. Defect detection in eggshell using a vision system to ensure the incubation in poultry production. Meas. J. Int. Meas. Confed. 135, 39–46. https://doi.org/10.1016/j.measurement.2018.09.059

Muhamedsalih, H., Elrawemi, M., Blunt, L., Xiangqi, L., Martin, H., 2015. A computerised data handling procedure for defect detection and analysis for large area substrates manufactured by roll-to-roll process, in: Laser Metrology and Machine Performance XI - 11th International Conference and Exhibition. pp. 82–89.

Nacereddine, N., Zelmat, M., Belaïfa, S.S., Tridi, M., 2005. Weld defect detection in industrial radiography based digital image processing. Proc. World Acad. Sci. Eng. Technol. 2, 1307–1312. https://doi.org/10.3233/978-1-61499-672-9-855

Najafabadi, F.S., Pourghassem, H., 2011. Corner defect detection based on dot product in ceramic tile images. Proc. - 2011 IEEE 7th Int. Colloq. Signal Process. Its Appl. CSPA 2011 293–297. https://doi.org/10.1109/CSPA.2011.5759890

Nestor, S.G.L., Kanko, J.A., Sibley, A.P., Fraser, J.M., 2017. In-Situ Morphology and Temperature Monitoring of Laser Based Metal Additive Manufacturing for Defect Detection, in: Optics InfoBase Conference Papers. p. 1.

Newell, T., Tillotson, B., Pearl, H., Miller, A., 2016. Detection of electrical defects with SEMVision in semiconductor production mode manufacturing. 2016 27th Annu. SEMI Adv. Semicond. Manuf. Conf. ASMC 2016 151–156. https://doi.org/10.1109/ASMC.2016.7491149

Nieminen, P., Kärkkäinen, T., Luostarinen, K., Muhonen, J., 2011. Neural prediction of product quality based on pilot paper machine process measurements. Lect. Notes Comput. Sci. (including Subser. Lect. Notes Artif. Intell. Lect. Notes Bioinformatics) 6593 LNCS, 240–249. https://doi.org/10.1007/978-3-642-20282-7_25

Nikunjkumar, P., Subhayan, M., Lihang, Y., 2018. EREL-Net: A Remedy for Industrial Bottle Defect Detection. Springer International Publishing. https://doi.org/10.1007/978-3-030-04375-9

Noh, C.H., Lee, S.L., Kim, D.H., Chung, C.W., Kim, S.H., 2010. An effective and efficient defect inspection system for TFT-LCD polarised films using adaptive thresholds and shape-based image analyses. Int. J. Prod. Res. 48, 5115–5135. https://doi.org/10.1080/00207540903117899

Nonaka, T., Sakata, Y., Marumo, Y., Okinishi, Y., Horinouchi, T., Ogawa, I., Watanabe, S., 2010. Development of Intelligent Forming Dies with In-Process Defect Detection System for Sheet Products. Appl. Mech. Mater. 34–35, 1034–1038. https://doi.org/10.4028/www.scientific.net/AMM.34-35.1034

O’Connell, J., 1990. Preventing manufacturing defects for electronic assembly manufacturing. Electro/90. Conf. Rec.

Oostra, A.J., Blom, P.W.M., Michels, J.J., 2015. Repair of defects in photoactive layer of organic solar cells. Sol. Energy Mater. Sol. Cells 134, 334–339. https://doi.org/10.1016/j.solmat.2014.12.013

ORAK, İ.M., ÇELİK, A., 2017. A parallel algorithm for defect detection of rail and profile in the manufacturing. J. Fac. Eng. Archit. Gazi Univ. 32, 439–448. https://doi.org/10.17341/gazimmfd.322168

Oumayma, E., Hamid, L., Chafik, S., 2018. Automatic detection and classification of manufacturing defects in metal boxes using deep neural networks. J. pone.

Park, H.S., Tran, N.H., Nguyen, D.S., 2017. Development of a predictive system for SLM product quality, in: IOP Conference Series: Materials Science and Engineering. https://doi.org/10.1088/1757-899X/227/1/012090

Pedrazzani, J.R., Klute, S.M., Gifford, D.K., Sang, A.K., Froggatt, M.E., 2012. Embedded and surface mounted fiber optic sensors detect manufacturing defects and accumulated damage as a wind turbine blade is cycled to failure, in: International SAMPE Technical Conference. p. 15.

Peled, A., Saphier, O., 2007. Manufacturing large LCDs while maintaining yields - Automated optical inspection helps detect and classify defects and facilitates an efficient repair process. Photonics Spectra 41, 78–80.

Peng, L., Tingting, L., Meng, F., Jian, L., Pingfu, L., Heewoong, K., Yanchun, L., 2018. Improving defect repair rate in automatic repair process of color filter manufacturing. Dig. Tech. Pap. - SID Int. Symp. 49, 1452–1455. https://doi.org/10.1002/sdtp.12185

Pivarčiová, E., Bezák, P., Iringová, M., 2013. Automation of product defect detection in a production system, in: Proceedings of the 2013 International Conference on Process Control, PC 2013. pp. 492–497. https://doi.org/10.1109/PC.2013.6581459

Pogodaev, A., Saraev, P., 2015. Neurostructural modelling and prediction of hot-rolled production defects by casting parameters. J. Chem. Technol. Metall. 50, 595–599.

Pourreza, H.R., Ameli, M., Naebi, M., Fazeli, S., Taghizadeh, B., 2018. Automatic Detection of Eggshell Defects Based on Image Processing. Int. J. Eng. Technol. 7, 61–64.

Raafat, H.M., Tolba, A.S., 2015. Homoscedasticity for defect detection in homogeneous flat surface products. Text. Res. J. 85. https://doi.org/10.1177/0040517514555795

Raj, A., Sajeena, A., 2018. Defects Detection in PCB Using Image Processing for Industrial Applications. 2018 Second Int. Conf. Inven. Commun. Comput. Technol. 1077–1079. https://doi.org/10.1109/ICICCT.2018.8473285

Rallo, R., Arenas, A., Giralt, F., 2002. Neural virtual sensor for the inferential prediction of product quality from process variables. Comput. Chem. Eng. 26, 1735–1754.

Robinson, A.P., Lewin, P.L., Swingler, S.G., 2006. Detection of Manufacturing Defects in Polymeric Cable Joint Insulation using X-rays. IEEE Int. Symp. Electr. Insul. 34–37.

Rosli, N.S., Fauadi, N.F., Awang, N.F., Noor, A.Z.., 2017. Vision-based defects detection for glass production based on improved image processing method. Spec. Issue iDECON 2016.

Ross, R.J., McDonald, K.A., Green, D.W., Schad, K.C., 1996. Stress wave nondestructive evaluation of logs to predict structural product quality. Mater. Sci. Forum 210–213, 109–114.

Rykalová, E., Peřina, Z., Fabian, R., Jonšta, P., 2015. Possibilities of Use of the Thermographic Measurement as a Tool for Detecting Defects and Improving the Production Process. Adv. Mater. Res. 1127, 23–29. https://doi.org/10.4028/www.scientific.net/AMR.1127.23

Saad, N.M., Abdul Rahman, N.N.S., Abdullah, A.R., Wahab, F.A., 2017. Shape defect detection for product quality inspection and monitoring system. Int. Conf. Electr. Eng. Comput. Sci. Informatics 4, 196–201. https://doi.org/10.11591/eecsi.4.1031

Saludes Rodil, S., Arnanz Gómez, R., Bernárdez, J.M., Rodríguez, F., Miguel, L.J., Perán, J.R., 2010. Laser welding defects detection in automotive industry based on radiation and spectroscopical measurements. Int. J. Adv. Manuf. Technol. 49, 133–145. https://doi.org/10.1007/s00170-009-2395-y

Saludes Rodil, S., Bernardez, J.M., Arnanz Gómez, R., Rodrıguez, F., Miguel, L.J., Peran, J.R., 2005. A METHOD FOR DETECTING DEFECTS IN LASER WELDINGS FOR THE AUTOMOTIVE INDUSTRY, in: Proceedings of the 16th IFAC World Congress. pp. 341–346.

Sanada, M., 2001. Defect Detection from Visual Abnormalities in Manufacturing Process Using I DDQ. J. Electron. Test. Theory Appl. 17, 275–281.

Santos, I., Nieves, J., Bringas, P.G., Penya, Y.K., 2009. MACHINE-LEARNING-BASED DEFECT PREDICTION IN HIGH-PRECISION FOUNDRY PRODUCTION, in: Structural Steel and Castings: Shapes and Standards. pp. 11–17.

Sayinci, B., 2016. Detection of Shape Manufacturing Defects of Flat Fan-Pattern Nozzle Orifices Using Elliptic Fourier Descriptors. J. Agric. Sci. 22, 26.

Schwerdtfeger, J., Singer, R.F., Körner, C., 2012. In situ flaw detection by IR-imaging during electron beam melting. Rapid Prototyp. J. 18, 259–263. https://doi.org/10.1108/13552541211231572

Seon, G., Makeev, A., Nikishkov, Y., Fergusson, L., 2018. Predicting Formation of Manufacturing Defects in Contoured Composites. AHS Int. 74th Annu. Forum Technol. Disp.

Sharpe, R., Banwell, G., Conway, P.P., West, A.A., 2014. Sensor-enabled PCBs to aid right first time manufacture through defect prediction. Proc. 16th Electron. Packag. Technol. Conf. EPTC 2014 366–371. https://doi.org/10.1109/EPTC.2014.7028396

Shen, Y., Lam, E.Y., 2006. Simultaneous Photometric Correction and Defect Detection in Semiconductor Manufacturing, in: Proceedings of SPIE. pp. 1–10. https://doi.org/10.1117/12.640138

Shibata, H., Cheldelin, B., Ishii, K., 2001. Assembly quality methodology: an application of the defect prediction to audio equipment assembled at various manufacturing sites, in: Proceedings of the ASME Design Engineering Technical Conference. pp. 333–339.

Shindo, W., Wang, E.H., Akella, R., Strojwas, A., 1997. Excursion detection and source isolation in defect inspection and classification, in: Statistical Metrology, 1997 2nd International Workshop. IEEE, pp. 90–93.

Siekanski, K., Borkowski, S., 2003. ANALYSIS OF FOUNDRY DEFECTS AND PREVENTIVE ACTIVITIES FOR QUALITY IMPROVEMENT OF CASTINGS. METALURGIJA 42, 57–59.

Sikora, R., Baniukiewicz, P., Chady, T., Lopato, P., Piekarczyk, B., Psuj, G., Grzywacz, B., Misztal, L., 2013. Detection and classification of weld defects in industrial radiography with use of advanced AI methods. FENDT 2013 - Proc. 2013 Far East Forum Nondestruct. Eval. New Technol. Appl. 12–17. https://doi.org/10.1109/FENDT.2013.6635520

Silva, J.A., Pais, C.P., Freitas, J.C.A., Carvalho, F.D., Rodrigues, F.C., 1993. Detection and automatic classification of defects in ceramic products, in: Proceedings of SPIE. pp. 22–28. https://doi.org/10.1117/12.138502

Skubalska-Rafajlowicz, E., 2008. Local correlation and entropy maps as tools for detecting defects in industrial images. Int. J. Appl. Math. Comput. Sci. 18, 41–47. https://doi.org/10.2478/v10006-008-0004-0

Smith, A.E., 1993. Predicting product quality with backpropagation: A thermoplastic injection moulding case study. Int. J. Adv. Manuf. Technol. 8, 252–257. https://doi.org/10.1007/BF01748635

Soukup, R., 2011. Defect Level Prediction of Printed Circuit Board Assembly Manufacturing based on DPMO Metric, in: Proceedings of the 8th Spanish Conference on Electron Devices. pp. 1–4.

Spinola, C.G., Canero, J., Moreno-Aranda, G., Bonelo, J.M., Martin-Vazquez, M., 2011. Real-time image processing for edge inspection and defect detection in stainless steel production lines. 2011 IEEE Int. Conf. Imaging Syst. Tech. IST 2011 - Proc. 1, 170–175. https://doi.org/10.1109/IST.2011.5962196

Steckenrider, J.S., Foster, R., Guha, S., Ra, Y., Kim, H., Sethuraman, A., 2001. Advanced defect-detection methods for CMP process modules in semiconductor manufacturing, in: Proceedings of SPIE. pp. 107–118. https://doi.org/10.1117/12.429353

Su, Y., Han, L., 2018. Product quality prediction based on bp neural network and rough set theory. Adv. Intell. Syst. Comput. 842, 997–1004. https://doi.org/10.1007/978-3-319-98776-7_119

Sugino, K., 2003. Optimized detecting system and defects detecting ability : Quality management system " MaxEye . P " to improve quality of paper manufacturing and finishing. Japanese J. Pap. Technol. 46, 24–25.

Susto, G.A., Terzi, M., Beghi, A., 2017. Anomaly Detection Approaches for Semiconductor Manufacturing. Procedia Manuf. 11, 2018–2024. https://doi.org/10.1016/j.promfg.2017.07.353

Sweckep, A., Strojwas, A., Li, X., 1997. Simulation of Defect Detection Schemes for Wafer Inspection in VLSI Manufacturing, in: Simulation of Semiconductor Processes and Devices. IEEE, pp. 145–148.

Swecker, A.L., Levy, A., Bell, B., 1997. Optimization of CMP Defect Detection Schemes, in: International Symposium on Semiconductor on Manufacturing. pp. 3–6.

Talbot, C.G., Barnard, R., Jamieson, J., Lo, W., Perez, P., Pindar, A., 1999. Productive application of voltage contrast for detection of optically undetectable defects. Proc. SPIE - Int. Soc. Opt. Eng. 3677. https://doi.org/10.1117/12.350835

Tapia, G., Elwany, A.H., Sang, H., 2016. Prediction of porosity in metal-based additive manufacturing using spatial Gaussian process models. Addit. Manuf. 12, 282–290. https://doi.org/10.1016/j.addma.2016.05.009

Tarrach, L., 2010. The New Generation of Quality Control for Polymer Resin - Defect Detection and Sorting at the Production Scale. Mater. Test. 52, 819–821. https://doi.org/10.3139/120.110191

Thirugnanam, M., Anouncia, S.M., 2014. An integrated approach for feature extraction and defect detection in industrial radiographic images - case study on welding defects. Int. J. Ind. Syst. Eng. 17, 424. https://doi.org/10.1504/IJISE.2014.063963

Tincher, W.C., Daley, W., Holcomb, W., 1992. Detection and Removal of Fabric Defects in Apparel Production. Int. J. Cloth. Sci. Technol. 4, 54–65. https://doi.org/10.1108/eb002994

Tirronen, V., Neri, F., Tommi, K., Majava, K., Rossi, T., 2008. An Enhanced Memetic Differential Evolution in Filter Design for Defect Detection. Evol. Comput. 16, 529–555. https://doi.org/10.1162/evco.2008.16.4.529

Tolba, A.S., 2011. Fast defect detection in homogeneous flat surface products. Expert Syst. Appl. 38, 12339–12347. https://doi.org/10.1016/j.eswa.2011.04.012

Tong, L., Wong, W.K., Kwong, C.K., 2017. Fabric Defect Detection for Apparel Industry: A Nonlocal Sparse Representation Approach. IEEE Access 5, 5947–5964. https://doi.org/10.1109/ACCESS.2017.2667890

TSAI‡, D.-M., Lu, W.-J., 1996. Detecting and locating burrs of industrial parts. Int. J. Prod. Res. 34, 3187–3205. https://doi.org/10.1080/00207549608905084

Varis, J., 1998. Defect detection in copper products with an infrared line scanner. Rev. Prog. Quant. Nondestruct. Eval.

Vasava, V., 2017. Defect Analysis of Inlet Tube Casting By Computer Simulation. Int. J. Mech. Prod. Eng. Res. Dev. 7, 133–146.

Veatch, M.H., 2000. Inspection strategies for multistage production systems with time-varying quality. Int. J. Prod. Res. 38, 837–853. https://doi.org/10.1080/002075400189185

Vikram, A., Agarwal, V., 2017. Patterning approach for detecting defect in device manufacturing. Semiconductors 51, 1661–1665. https://doi.org/10.1134/S1063782617120193

Vincent, A.G., Rebuffel, V., Guillemaud, R., Gerfault, L., Coulon, P.Y., 2006. Defect detection in industrial casting components using digital X-ray radiography. Foundry Trade J. 180, 160–163.

Voiry, M., Madani, K., Amarger, V., Houbre, F., 2006. Toward Automatic Defects Clustering in Industrial Production Process Combining Optical Detection and Unsupervised Artificial Neural Network Techniques. Proc. 2nd Int. Work. Artif. Neural Networks Intell. Inf. Process. 25–34. https://doi.org/10.5220/0001223100250034

Wakaf, Z., Jalab, H.A., 2018. Defect detection based on extreme edge of defective region histogram. J. King Saud Univ. - Comput. Inf. Sci. 30, 33–40. https://doi.org/10.1016/j.jksuci.2016.11.001

Walter, V., Bourbon, G., Le Moal, P., Kacem, N., Lardiès, J., 2016. Electrostatic Actuation to Counterbalance the Manufacturing Defects in a MEMS Mass Detection Sensor Using Mode Localization. Procedia Eng. 168, 1488–1491. https://doi.org/10.1016/j.proeng.2016.11.431

Wang, J., Tan, L., Lai, S., 2013. Apply Neutron Radiation and X-Ray Images Fusion for Defect Detection in Manufacturing. Adv. Mech. Electron. Eng. LNEE 178, 507–512.

Wang, J.L., Sun, X.W., Tan, F.H., 2010. Analysis of Defects of Aluminum Alloys in the Lost Foam Process and Prevention Methods. Adv. Mater. Res. 148–149, 191–194. https://doi.org/10.4028/www.scientific.net/AMR.148-149.191

Wang, K., Jiang, W., Li, B., 2016. A spatial variable selection method for monitoring product surface. Int. J. Prod. Res. 54, 4161–4181. https://doi.org/10.1080/00207543.2015.1109723

Wang, M.J.J., Wu, W.Y., Hsu, C.C., 2002. Automated post bonding inspection by using machine vision techniques. Int. J. Prod. Res. 40, 2835–2848. https://doi.org/10.1080/00207540210136568

Wang, T., Chen, Y., Qiao, M., Snoussi, H., 2018. A fast and robust convolutional neural network-based defect detection model in product quality control. Int. J. Adv. Manuf. Technol. 94, 3465–3471. https://doi.org/10.1007/s00170-017-0882-0

Weiss, I., Vogel-Heuser, B., 2018. Assessment of variance & distribution in data for effective use of statistical methods for product quality prediction. Automatisierungstechnik 66. https://doi.org/10.1515/auto-2017-0115

Williams, C.D., Paul, M., B, T.D., 2016. Enhancing Automated Defect Detection in Collagen Based Manufacturing by Employing a Smart Machine Vision Technique, in: Pacific-Rim Symposium on Image and Video Technology. Springer International Publishing, pp. 155–166. https://doi.org/10.1007/978-3-319-30285-0

Williams, J., Dryburgh, P., Clare, A., Rao, P., Samal, A., 2018. Defect Detection and Monitoring in Metal Additive Manufactured Parts through Deep Learning of Spatially Resolved Acoustic Spectroscopy Signals. ASTM Int. 2, 203–226. https://doi.org/10.1520/SSMS20180035

Wooldridge, A.B., Chapman, R.K., Woodcock, G.S., Munns, I., Georgiou, G., 1997. Reliability of radiography for detection of planar manufacturing defects in thick-section welds. Insight Non-Destructive Test. Cond. Monit. 39, 139–147.

Wu, J.Y., Sfarra, S., Yao, Y., 2018. Sparse Principal Component Thermography for Subsurface Defect Detection in Composite Products. IEEE Trans. Ind. Informatics 3203. https://doi.org/10.1109/TII.2018.2817520

Wu, S.M., Hu, S.J., 1993. Defect preventive quality control in manufacturing. Concurr. Eng. Tools Technol. Mech. Syst. Des. Proc. NATO Adv. Study Inst.

Yahaghi, E., 2016. Using total variation denoising for detecting defects in industrial radiography. Insight - Non-Destructive Test. Cond. Monit. 58, 201–205. https://doi.org/10.1784/insi.2016.58.4.201

Yamamoto, R., Terashita, Y., Tatsumi, M., Itoh, H., Umenai, K., 2016. Investigation of Cause and Prevention Measures against Surface Defects on Thermit Welds. Q. Rep. RTRI 57, 112–117. https://doi.org/10.2219/rtriqr.57.2_112

Yan, Z., Chiu, C.-C., Dong, W., Yao, Y., 2014. A LASSO-based batch process modeling and end-product quality prediction method. IFAC Proc. Vol. 19, 6704–6709.

Yao, B., Imani, F., Sakpal, A.S., Reutzel, E. (Ted), Yang, H., 2017. Multifractal Analysis of Image Profiles for the Characterization and Detection of Defects in Additive Manufacturing. J. Manuf. Sci. Eng. 140, 1–13. https://doi.org/10.1115/1.4037891

Yazidi, K., Darmoul, S., Hajri-Gabouj, S., 2018. Intelligent product quality control and defect detection: A case study. 2018 Int. Conf. Adv. Syst. Electr. Technol. 98–103. https://doi.org/10.1109/ASET.2018.8379841

Yeh, C.H., Chen, C.H., Wu, F.C., Chen, K.Y., 2007. Validation and evaluation for defect-kill-rate and yield estimation models in semiconductor manufacturing. Int. J. Prod. Res. 45, 829–844. https://doi.org/10.1080/00207540600677732

Zanchi, A., Zappa, F., Ghioni, M., Giudice, A., Morrison, A.P., Sinnis, V.S., 2000. Probe detectors for mapping manufacturing defects. Proc. 2000 Third IEEE Int. Caracas Conf. Devices, Circuits Syst. (Cat. No.00TH8474) 3–6. https://doi.org/10.1109/ICCDCS.2000.869855

Zeng, B., Wang, Y., He, Q., Jiang, X., 2015. On-line Detection Method of Quality Defects in Manufacturing Process based on Wavelet Finite Element, in: International Conference on Management, Education, Information and Control. pp. 877–881.

Zhang, C., Liu, X., Shi, J., Zhu, J., 2006. Neural soft-sensor of product quality prediction. Proc. World Congr. Intell. Control Autom. 1, 4881–4885. https://doi.org/10.1109/WCICA.2006.1713312

Zhang, H., Zhao, J., Yong, X., Zhang, C., Ji, Y., 2017. Machine Learning Based Approaches for Medium-thick Plate Stress Analysis Feature Extraction and Product Defect Prediction. Proc. 29th Chinese Control Decis. Conf. CCDC 2017 6366–6369. https://doi.org/10.1109/CCDC.2017.7978317

Zhang, X., Nansen, C., Aryamanesh, N., Yan, G., Boussaid, F., 2015. Importance of spatial and spectral data reduction in the detection of internal defects in food products. Appl. Spectrosc. 69, 473–480. https://doi.org/10.1366/14-07672

Zhao, W., Lee, J., Deshpande, A., 2012. A study of machining process power monitoring and product quality prediction. Tech. Progr. MFPT 2012, Progn. Heal. Manag. Solut. Conf. - PHM Driv. Effic. Oper. Maint.

Zhao, Y.J., Yan, Y.H., Song, K.C., 2017. Vision-based automatic detection of steel surface defects in the cold rolling process: considering the influence of industrial liquids and surface textures. Int. J. Adv. Manuf. Technol. 90, 1665–1678. https://doi.org/10.1007/s00170-016-9489-0

Zhengbing, Y., Chih-Chiun, C., Yuan, Y., 2015. Regularization-Based Statistical Batch Process Modeling for Final Product Quality Prediction. Rom. J. Morphol. Embryol. 56, 1495–1502. https://doi.org/10.1002/aic

Zhou, H., Yu, K.M., 2017. Imbalanced data classification for defective product prediction based on industrial wireless sensor network. 2017 6th Int. Conf. Futur. Gener. Commun. Technol. FGCT 2017 54–59. https://doi.org/10.1109/FGCT.2017.8103728

Zhou, Q., Xiong, Z., Zhang, J., Xu, Y., 2006. Hierarchical Neural Network Based Product Quality Prediction of Industrial Ethylene Pyrolysis Process, in: Third International Symposium on Neural Network. pp. 1132–1137.

Zhu, X., Chen, R., Zhang, Y., 2014. Automatic defect detection in spring clamp production via machine vision. Abstr. Appl. Anal. 2014. https://doi.org/10.1155/2014/164726

Zoesch, A., Wiener, T., Kuhl, M., 2015. Zero defect manufacturing: Detection of cracks and thinning of material during deep drawing processes. Procedia CIRP 33, 179–184. https://doi.org/10.1016/j.procir.2015.06.033
